# Supplementary material for: Anti-Infectives Restore ORKAMBI® Rescue of F508del-CFTR Function in Human Bronchial Epithelial Cells Infected with Clinical Strains of P. aeruginosa
Source: PubMed Central journal article supplement (PMC7072183; doi:10.3390/biom10020334), 2020-02-19
Supplement: biomolecules-10-00334-s001.pdf [file biomolecules-10-00334-s001.pdf]

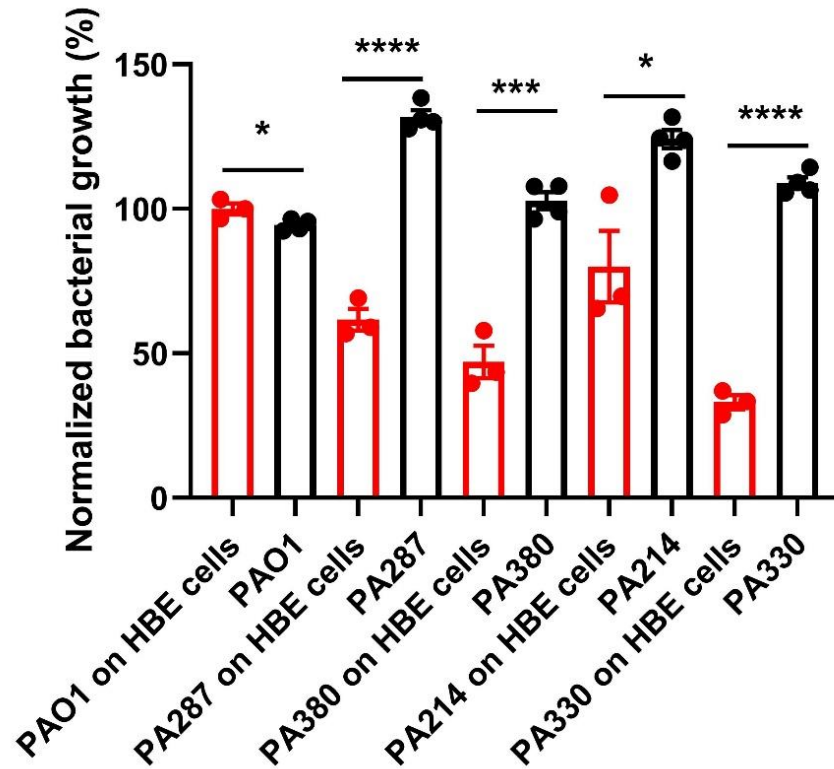

Figure S1.

**Figure S1. Normalized *P. aeruginosa* growth in media and atop HBE cells.** Background-subtracted luminescence of PAO1 and clinical strains of *P. aeruginosa* grown in cell media (black), or atop of F508del-CFTR HBE cells treated with VX-809 (red). Bacterial load was recorded in the absence of 6K-F17/tobramycin after 4 hr. Significance is reported as follows: ns, not significant; \*\*  $p < 0.01$ ; \*\*\*  $p < 0.001$ ; \*\*\*\*  $p < 0.0001$ . Data represent mean  $\pm$  SEM ( $n \geq 4$  biological replicates)
